# Supplementary material for: A photochromic metal–organic framework with a rare 3D self-interpenetrated architecture and an ultrahigh MnO4− sensing ability
Source: Royal Society of Chemistry journal article supplement (doi:10.1039/d4nj02133a), 2024-01-01
Supplement: d4nj02133a1.pdf [file d4nj02133a1.pdf]

# **A photochromic metal-organic framework with rare 3-D self-interpenetrated architecture and ultrahigh $\text{MnO}_4^-$ sensing ability**

Jinfang Zhang<sup>a,\*</sup>, Yinlong Yue<sup>a</sup>, Xingyu Tao<sup>a</sup>, Jiarun Zhang<sup>a</sup>, Dejing Yin<sup>b</sup> and Chi Zhang<sup>a,c,\*</sup>

<sup>a</sup> *International Joint Research Center for Photoresponsive Molecules and Materials, School of Chemical and Material Engineering, Jiangnan University, Wuxi 214122, P. R. China*

<sup>b</sup> *School of Biotechnology, Jiangnan University, Wuxi 214122, P. R. China*

<sup>c</sup> *School of Chemical Science and Engineering, Tongji University, Shanghai 200092, P. R. China*

## **Table of contents**

- 1. Table S1** The information of main chemicals.
- 2. Figure S1** The asymmetric unit of **1**.
- 3. Figure S2** The coordination and connected environment of **L** and  $\text{OBA}^{2-}$ .
- 4. Figure S3** 1-D chains formed by  $\text{OBA}^{2-}$  and **L**.
- 5. Figure S4** The simulated and experimental PXRD of **1** and **1'**.
- 6. Figure S5.** The mass of the crystal of **1** before and after soaking in water for 7 days.
- 7. Figure S6** PXRD pattern of **1** after soaking in pH range 2-12 for 24 h.
- 8. Figure S7** The TGA of **1**.
- 9. Figure S8** The crystal optical images of **1** (a); **1** after soaking in  $\text{H}_2\text{O}$  (b); **1'** after soaking in  $\text{H}_2\text{O}$  (c); **1** after soaking in  $\text{MnO}_4^-$  (d); **1'** after soaking in  $\text{MnO}_4^-$  (e).
- 10. Figure S9** Reusability of **1** for sensing  $\text{MnO}_4^-$  in  $\text{H}_2\text{O}$  and PXRD patterns of **1** after four cycles detecting  $\text{MnO}_4^-$  compared with original patterns.
- 11. Figure S10** Reusability of **1'** for sensing  $\text{MnO}_4^-$  in  $\text{H}_2\text{O}$  and PXRD patterns of **1'** after four cycles detecting  $\text{MnO}_4^-$  compared with original patterns.

**Table S1** The information of main chemicals.

| Chemicals                 | Manufacturer |
|---------------------------|--------------|
| $\text{CBr}_4$            | Adamas       |
| $\text{PPh}_3$            | Adamas       |
| Toluene                   | Titan        |
| 9,10-Anthracenedione      | Adamas       |
| 4-pyridine boronic acid   | Adamas       |
| $\text{Pd}(\text{OAc})_2$ | Adamas       |
| $\text{Na}_2\text{CO}_3$  | Adamas       |
| dioxane                   | Titan        |
| ethyl acetate             | Titan        |
| dichloromethane           | Titan        |
| methanol                  | Titan        |
| isopropanol               | Titan        |
| acetonitrile              | Titan        |

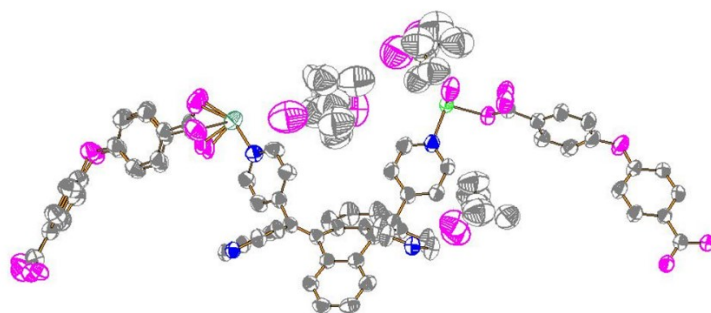

Figure S1. The asymmetric unit of **1** (Ni1, bright green; Ni2, sea green; N, blue; O pink; C, grey; all H atoms are omitted for clarity).

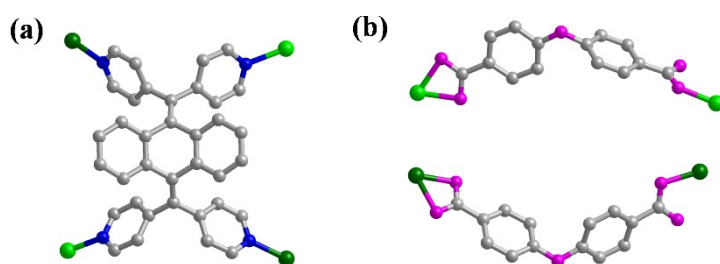

Figure S2. The coordination and connected environment of **L** (a) and  $\text{OBA}^{2-}$  (b) (Ni1, bright green; Ni2, sea green; N, blue; O pink; C, grey; all H atoms are omitted for clarity).

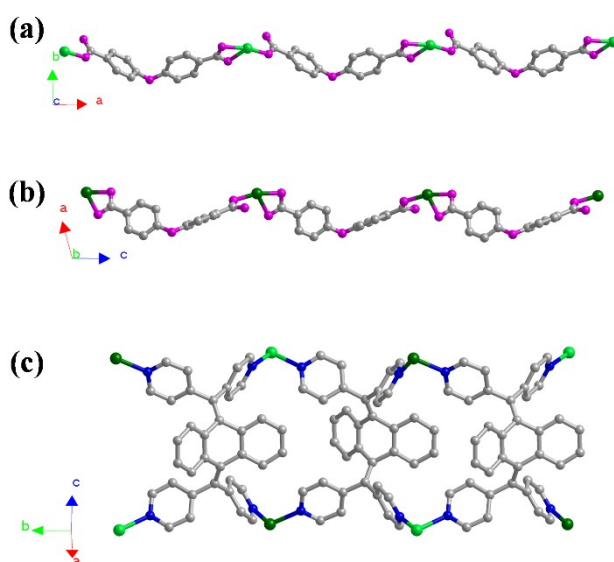

Figure S3. 1-D chains formed by  $\text{OBA}^{2-}$  (a, b) and **L** (c) (Ni1, bright green; Ni2, sea green; N, blue; O pink; C, grey; all H atoms are omitted for clarity).

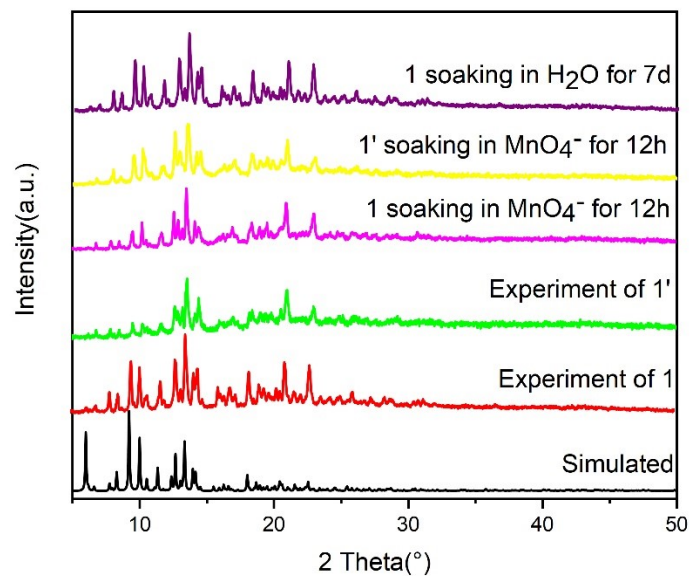

Figure S4. The simulated and experimental PXRD of **1** and **1'**.

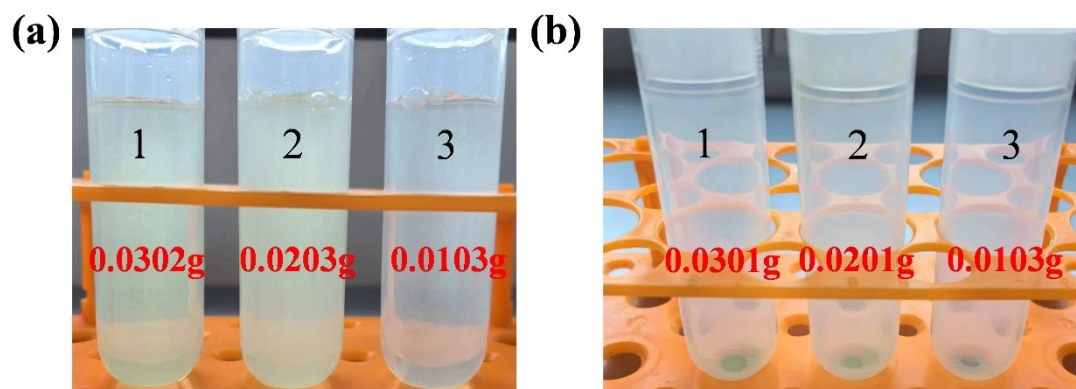

Figure S5. The mass of the crystal of **1** before and after soaking in water for 7 days.

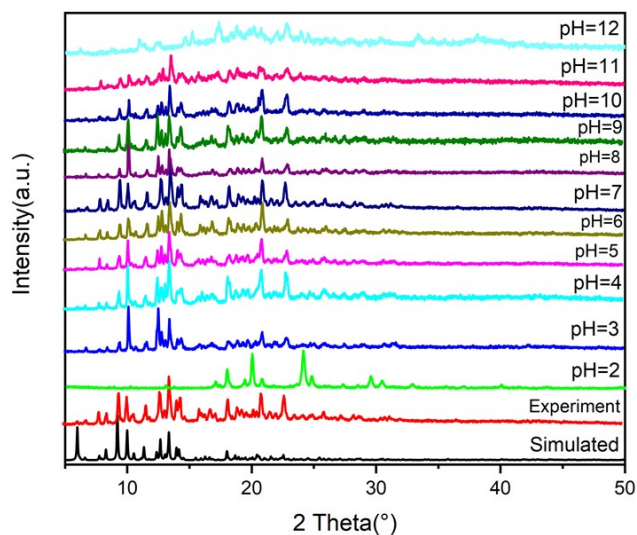

Figure S6. PXRD pattern of 1 after soaking in pH range 2-12 for 24 h.

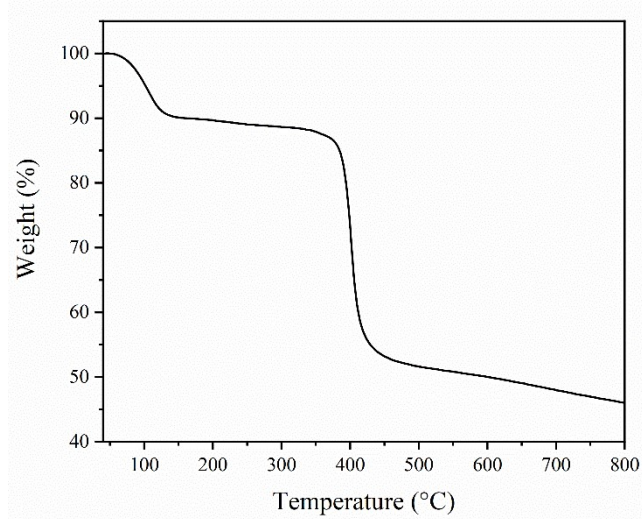

Figure S7. The TGA of 1.

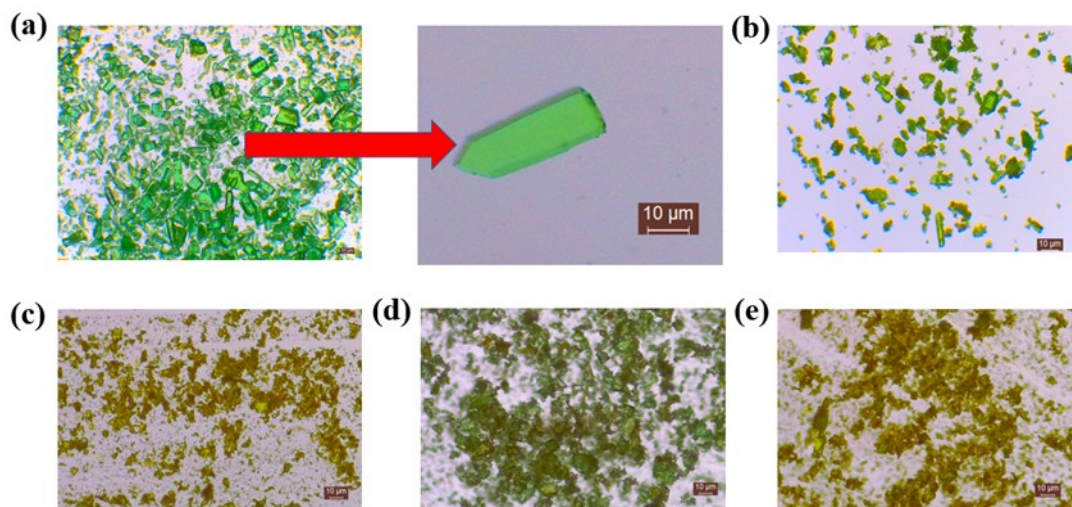

Figure S8. The crystal optical images of 1 (a); 1 after soaking in  $\text{H}_2\text{O}$  (b); 1' after soaking in  $\text{H}_2\text{O}$  (c); 1 after soaking in  $\text{MnO}_4^-$  (d); 1' after soaking in  $\text{MnO}_4^-$  (e).

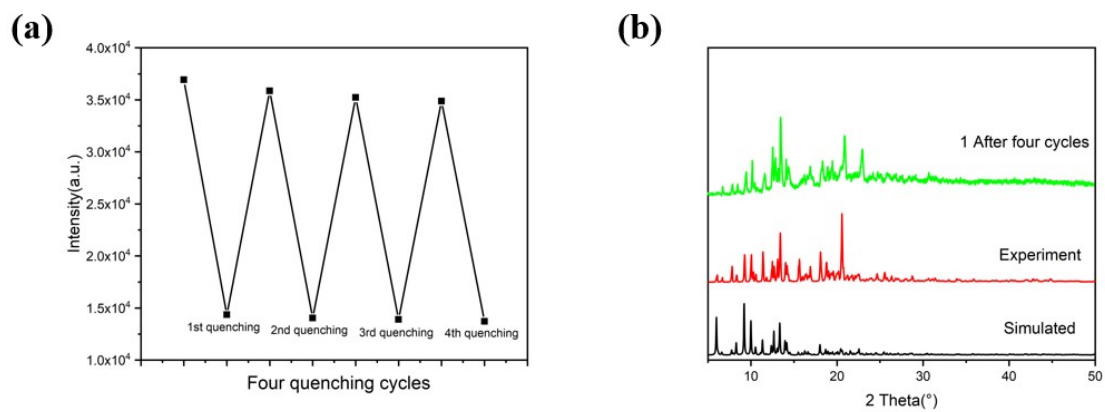

Figure S9. Reusability of **1** for sensing  $\text{MnO}_4^-$  in  $\text{H}_2\text{O}$  and PXRD patterns of **1** after four cycles detecting  $\text{MnO}_4^-$  compared with original patterns.

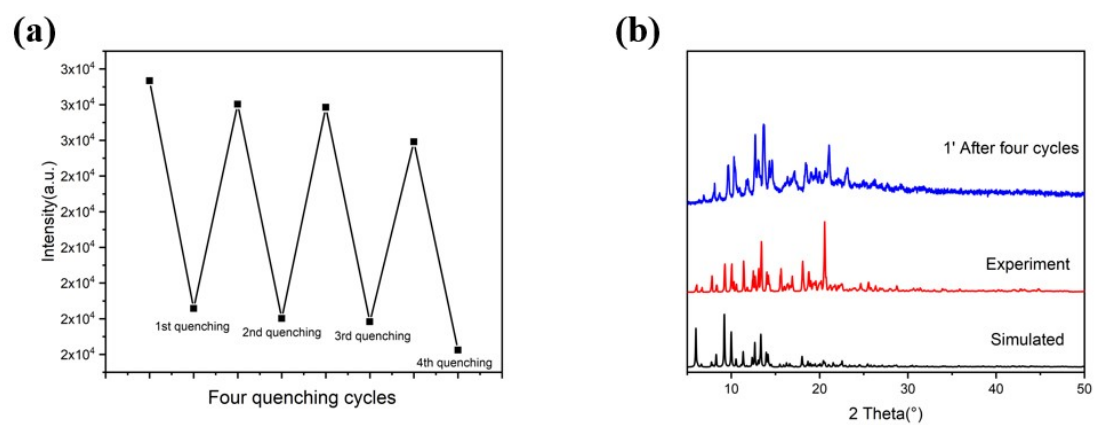

Figure S10. Reusability of **1'** for sensing  $\text{MnO}_4^-$  in  $\text{H}_2\text{O}$  and PXRD patterns of **1'** after four cycles detecting  $\text{MnO}_4^-$  compared with original patterns.
